# Supplementary material for: Comparative Life-Cycle Assessment of Electricity-Generation Technologies: West Texas Case Study
Source: MDPI journal article supplement (doi:10.3390/en17050992), 2024-02-20
Supplement: s1 [file s1]

# Supplementary Information for Das et al., 2024

## FIGURES

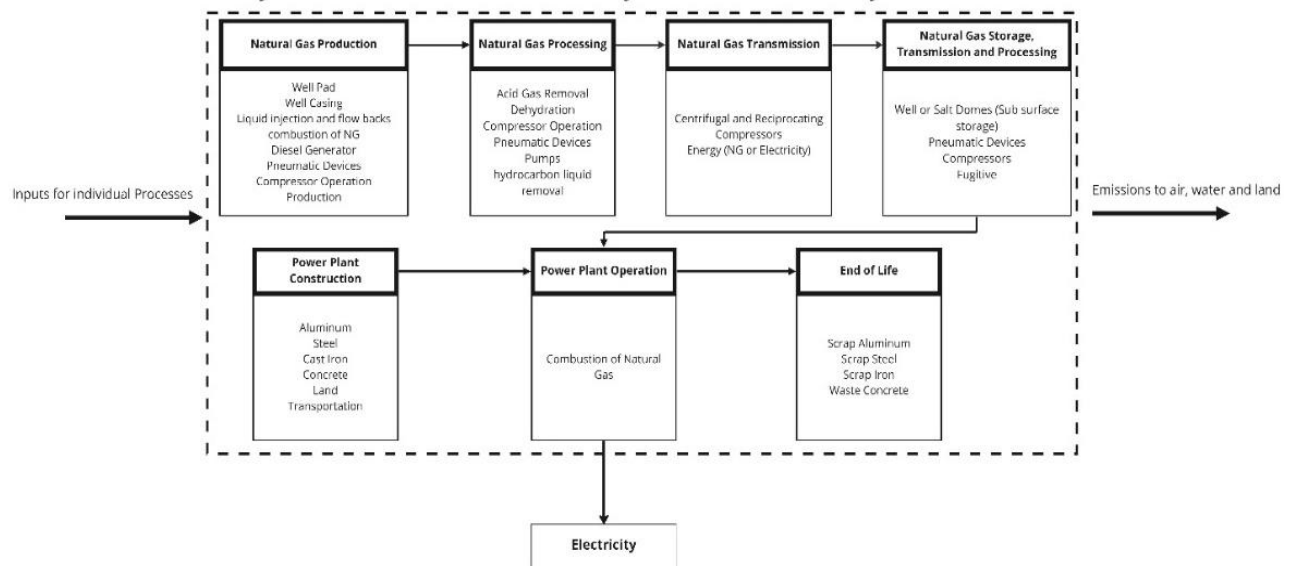

**Figure S1.** System boundary of the CCGT plant under study

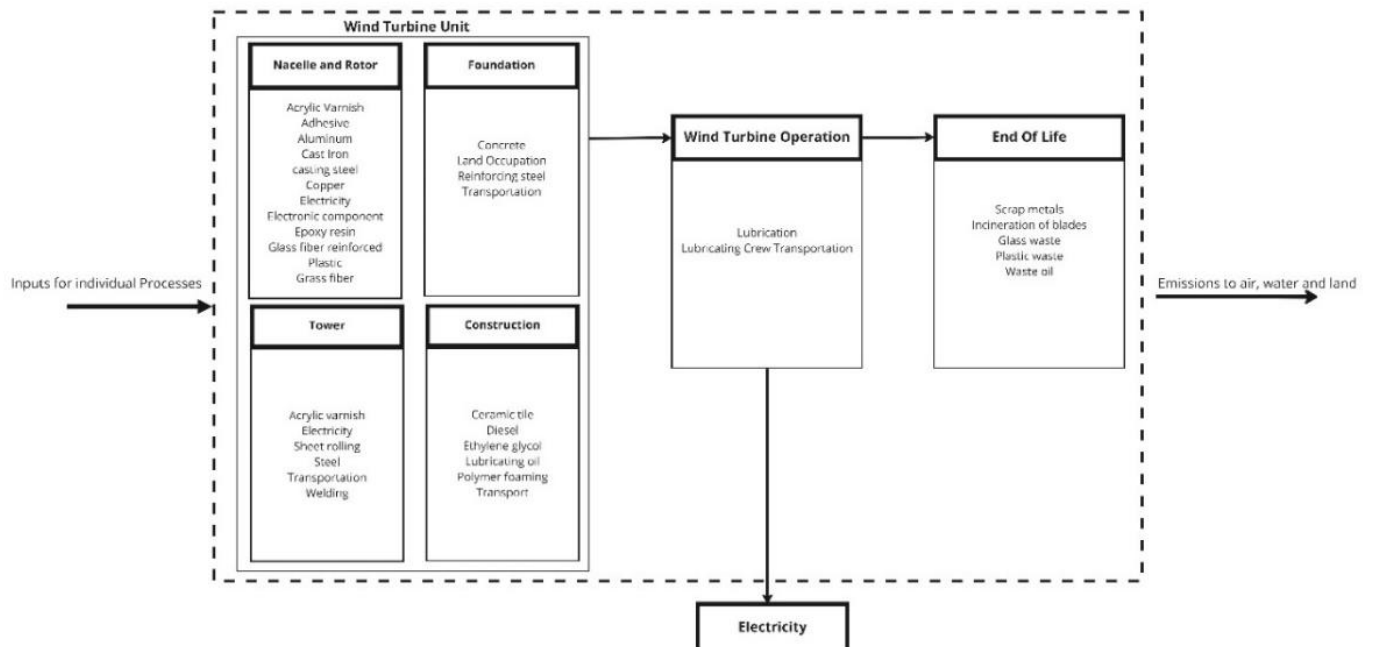

**Figure S2.** System boundary of the wind turbine under study

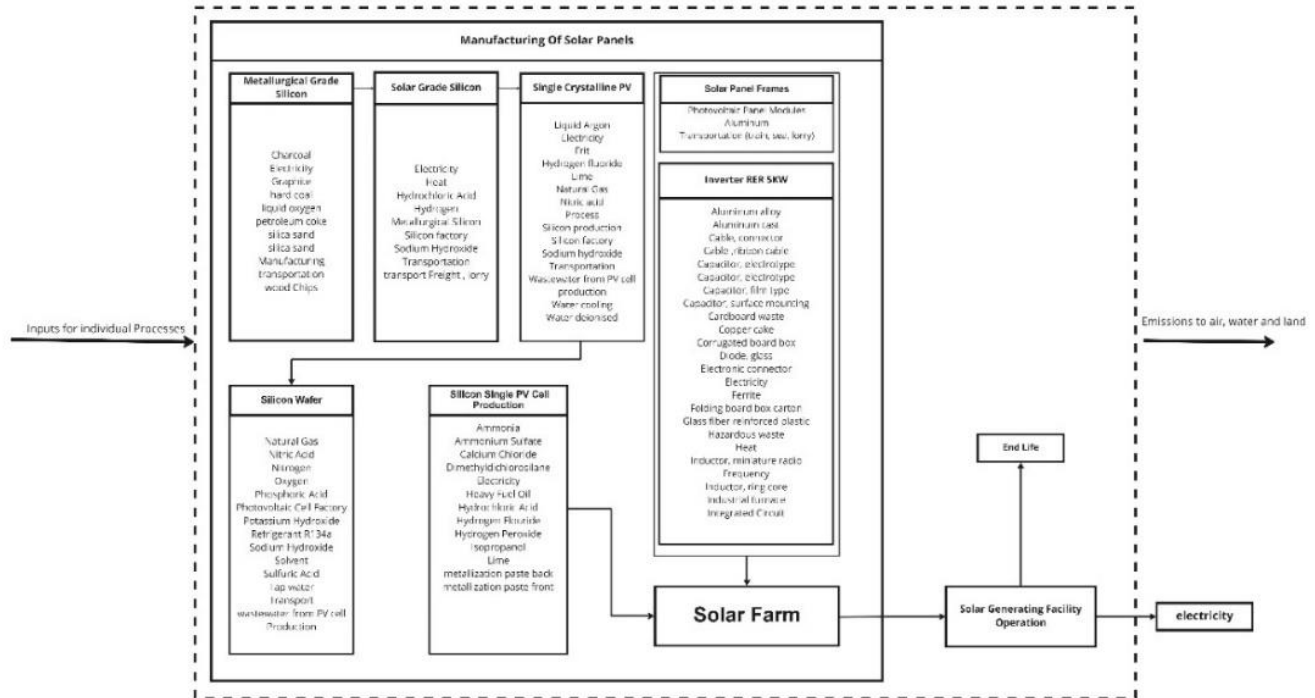

**Figure S3.** System boundary of the PV system under study

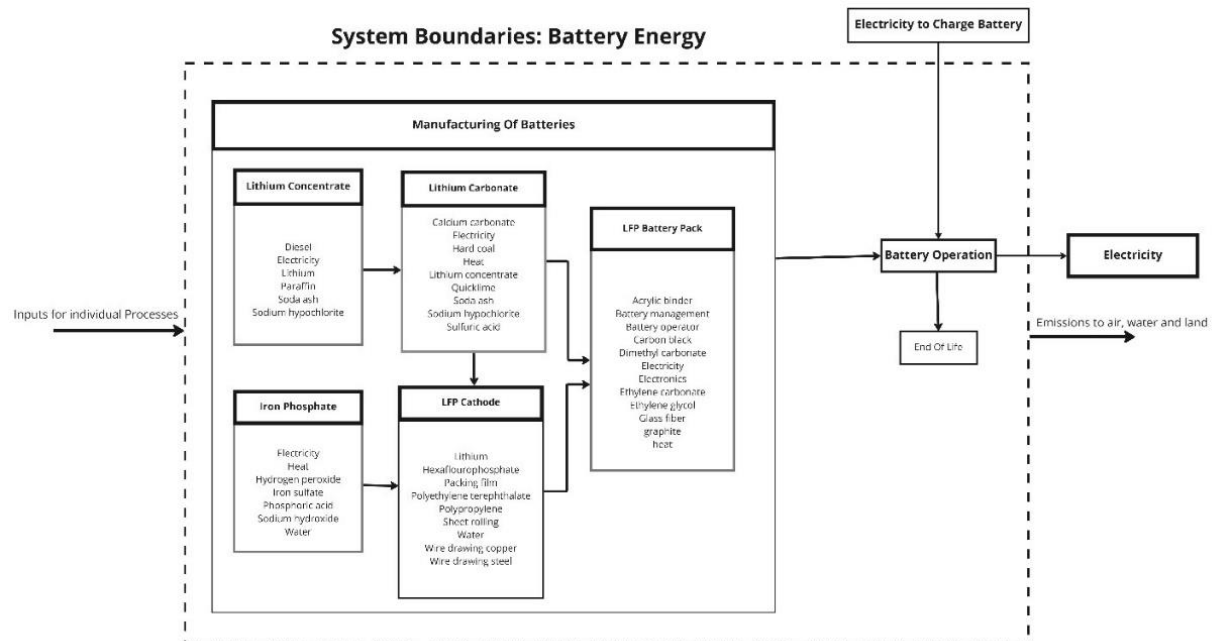

**Figure S4.** System boundary of BESS under study

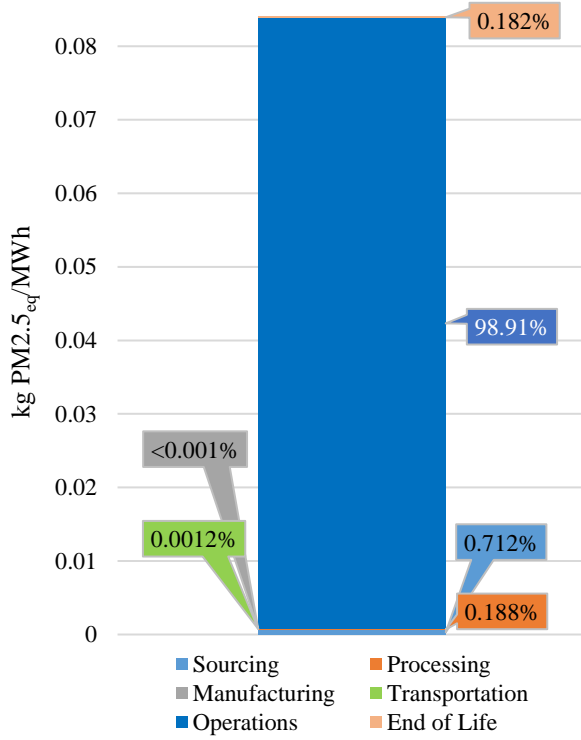

Fine particulate matter formation

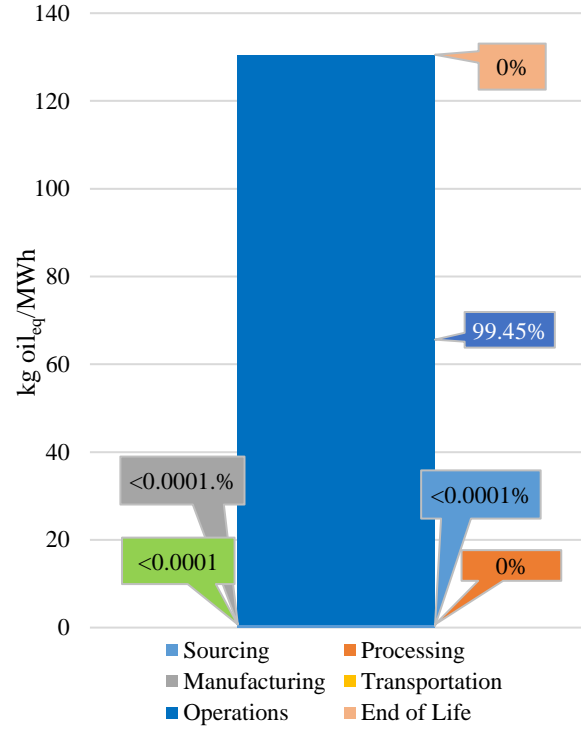

Fossil Resource Scarcity

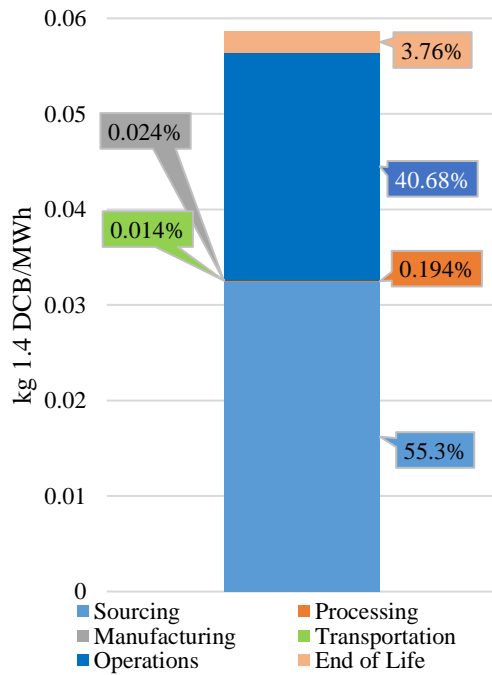

Freshwater Ecotoxicity

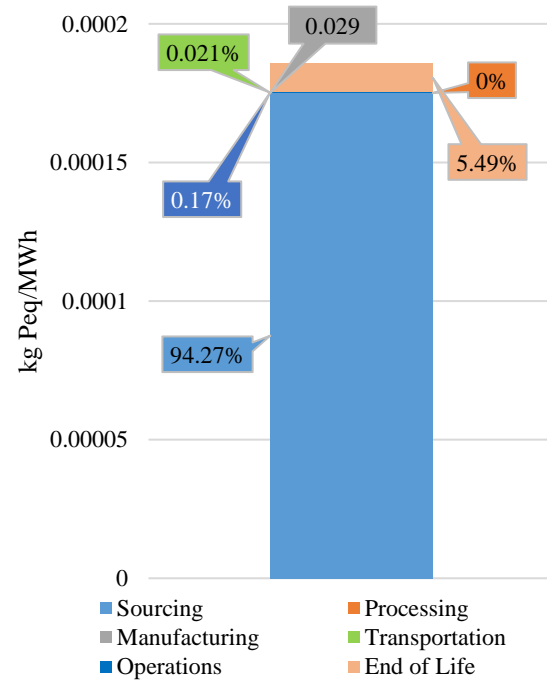

Freshwater Eutrophication

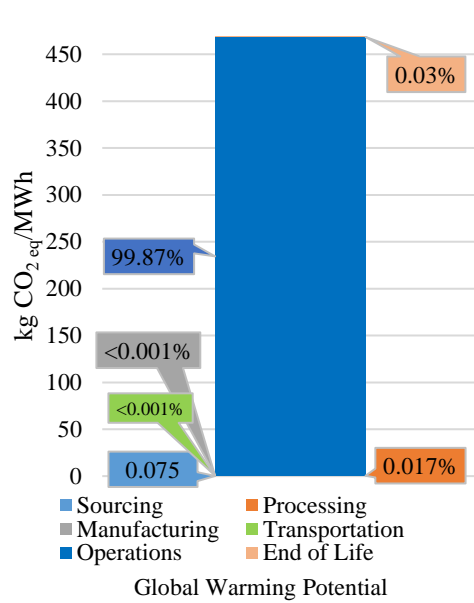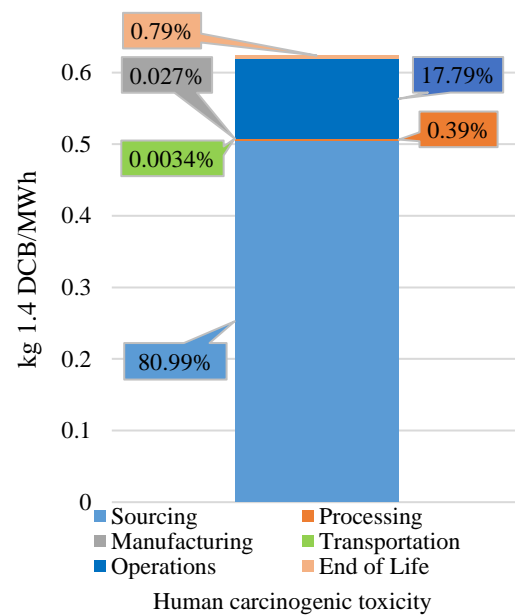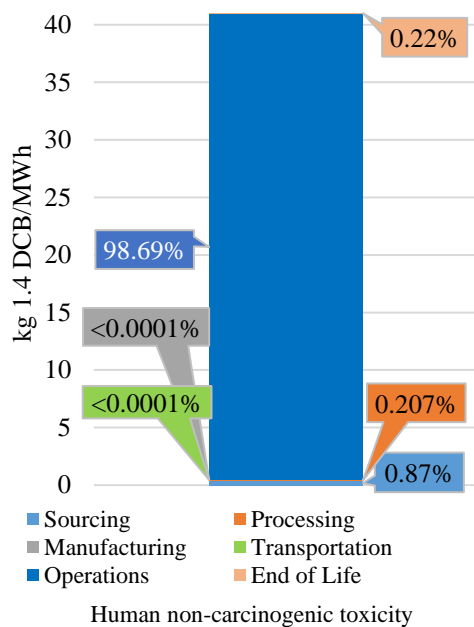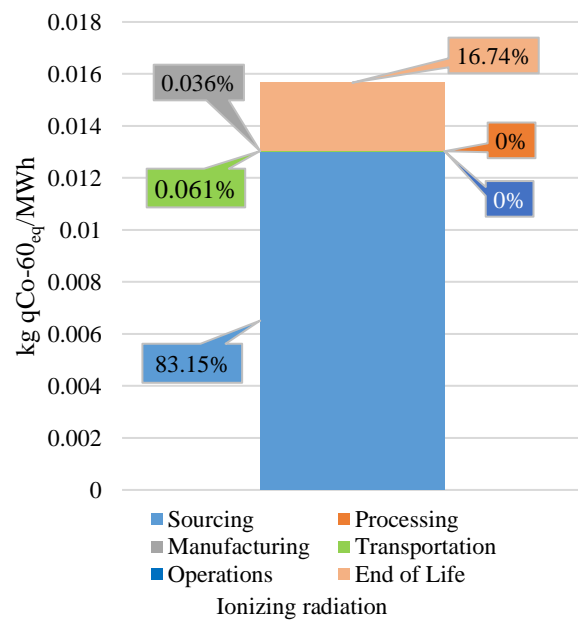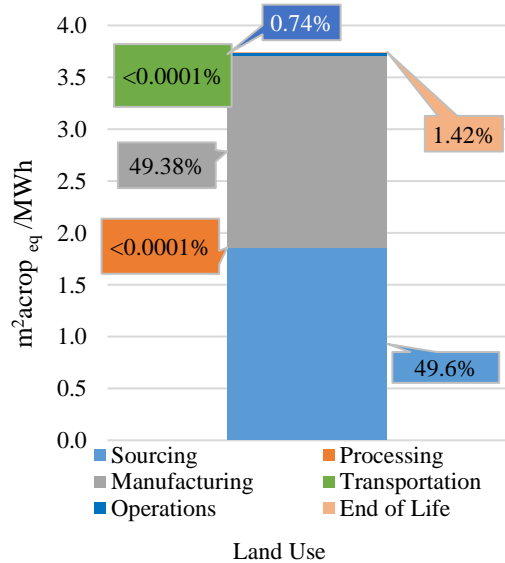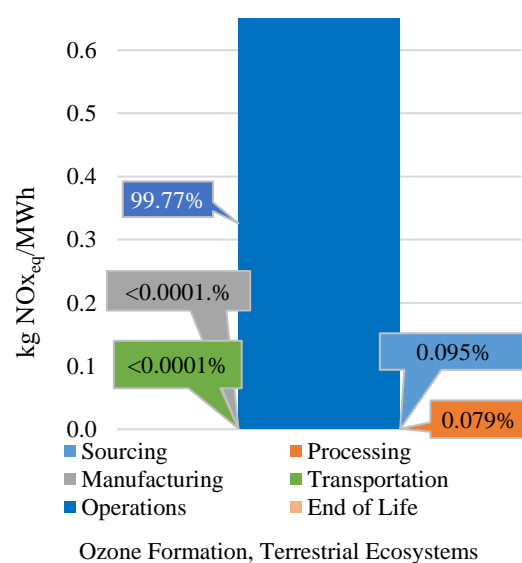

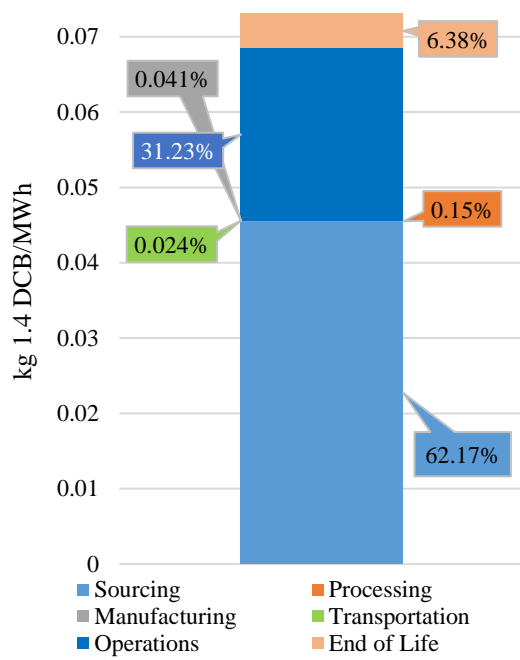

Marine ecotoxicity

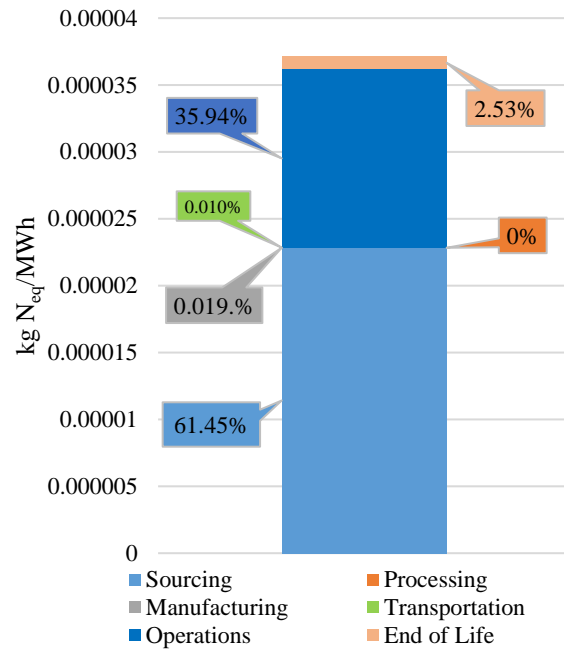

Marine Eutrophication

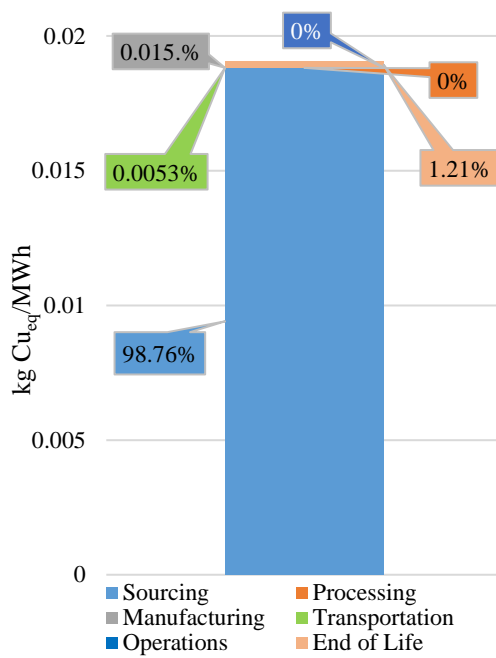

Mineral Resource Scarcity

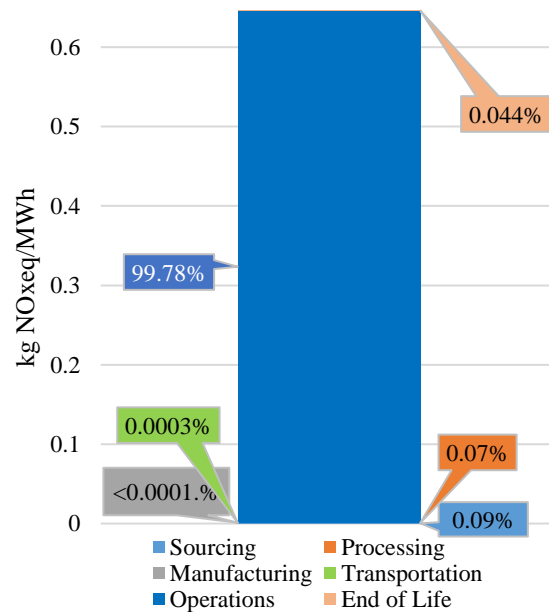

Ozone Formation, Human Health

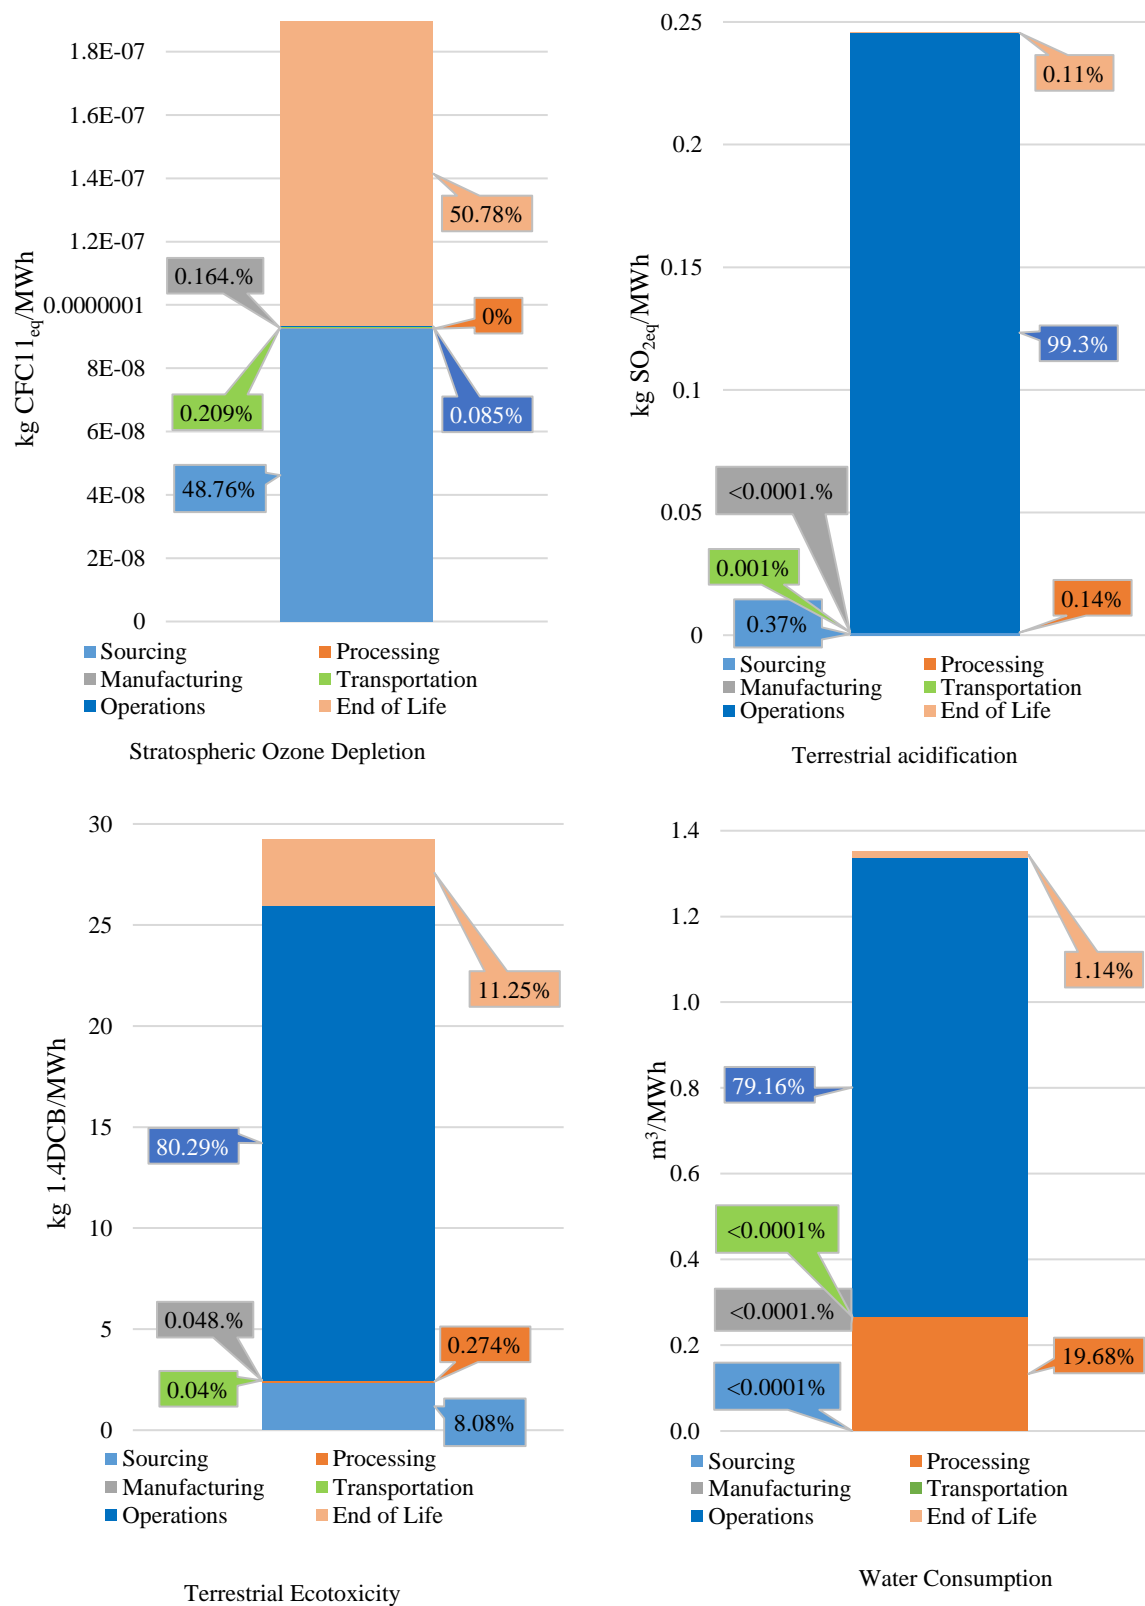

**Figure S5.** Per MWh environmental impacts of CCGT (500 MW)

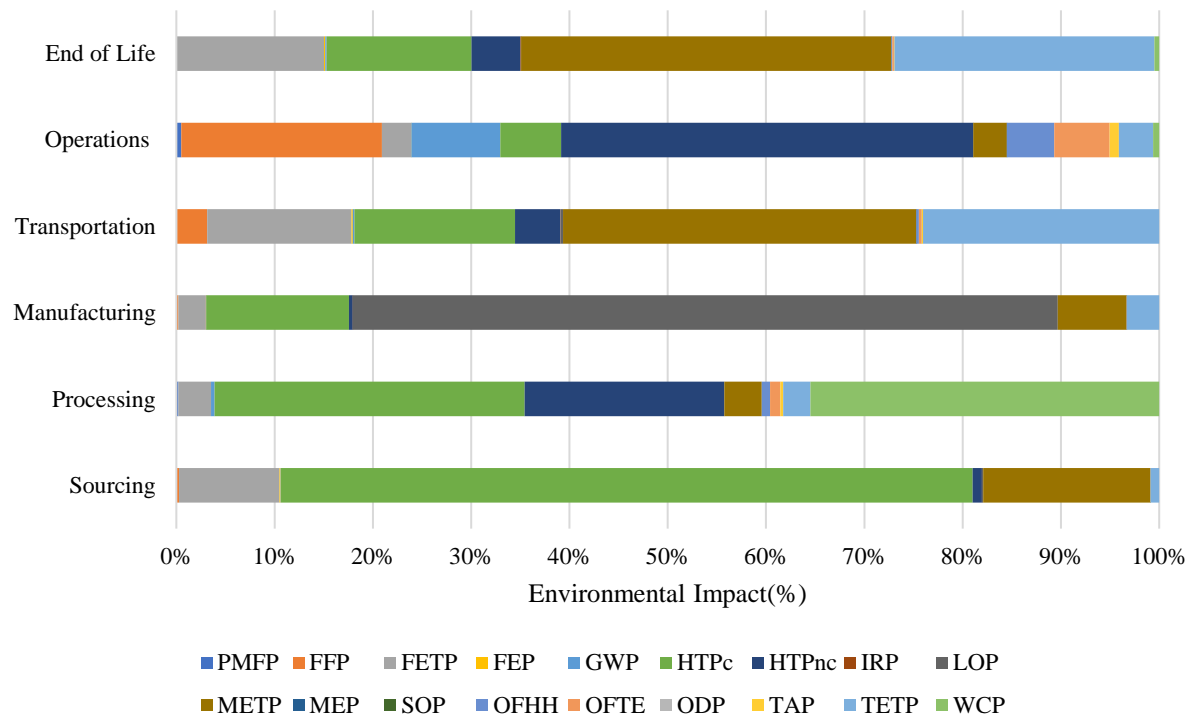

**Figure S6(a).** Single score environmental impacts of CCGT

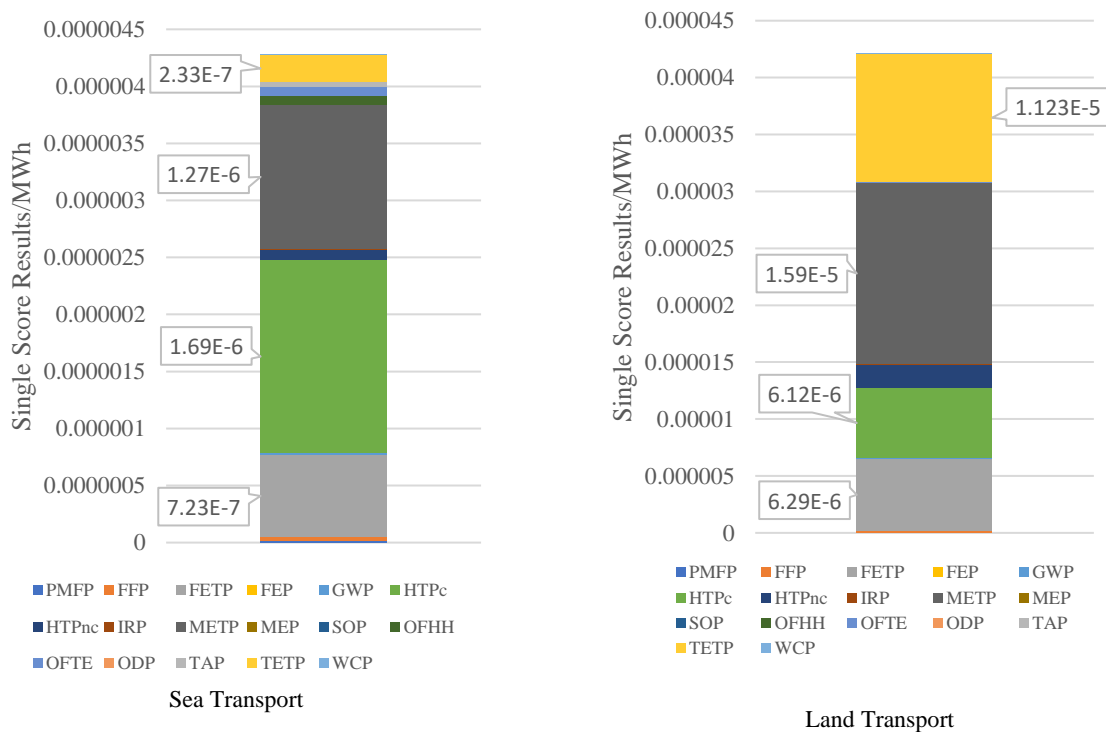

**Figure S6(b).** Single score environmental impacts of sea and land transport for CCGT

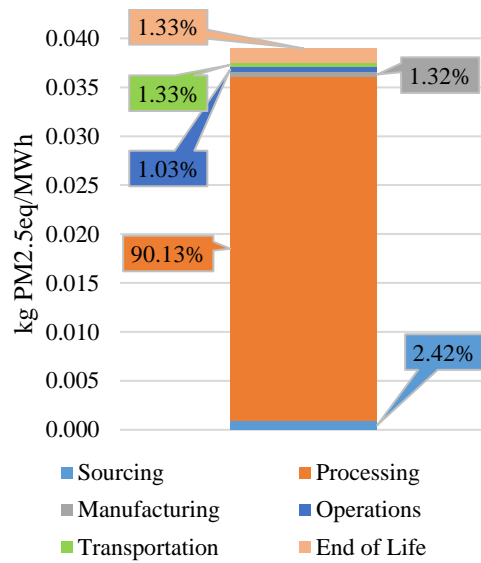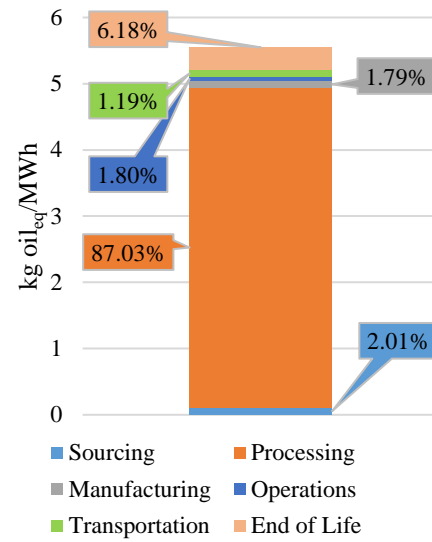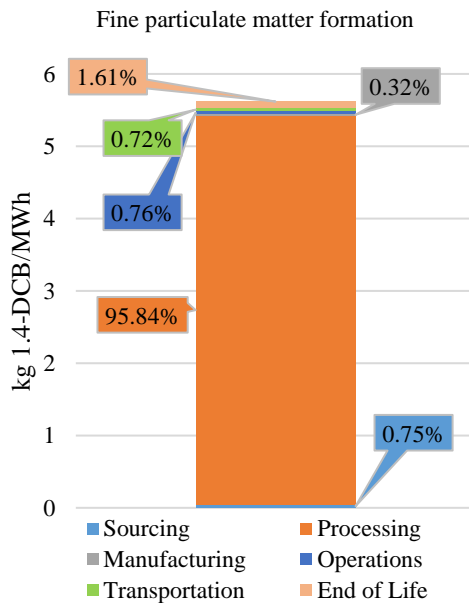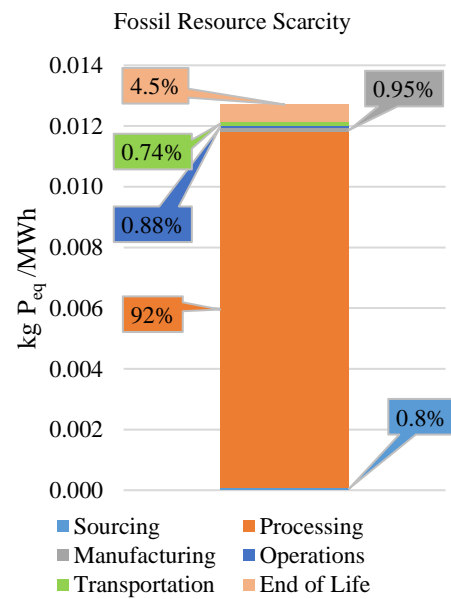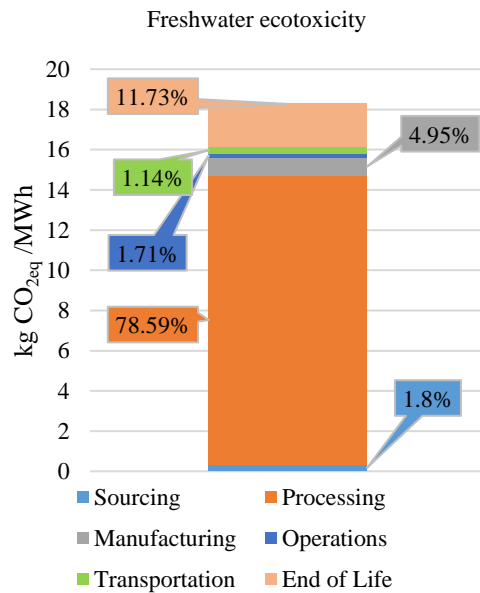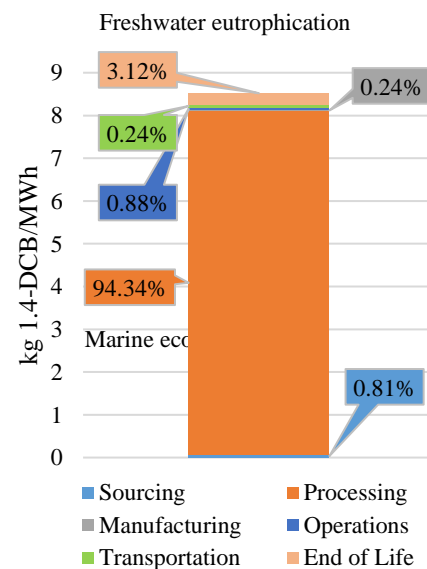

Human carcinogenic toxicity



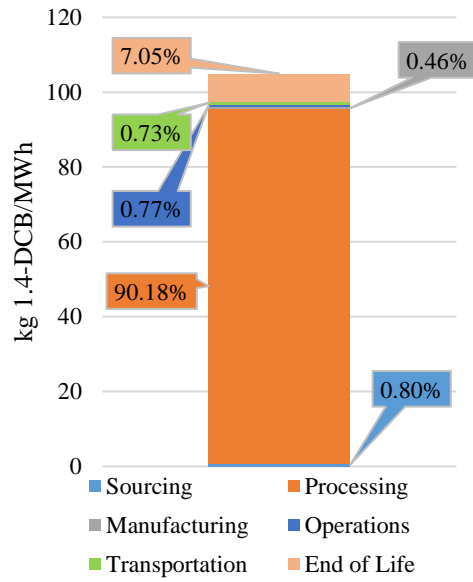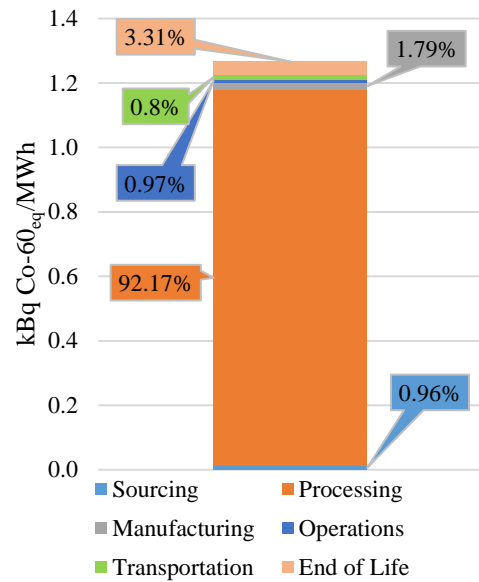

Human non-carcinogenic toxicity

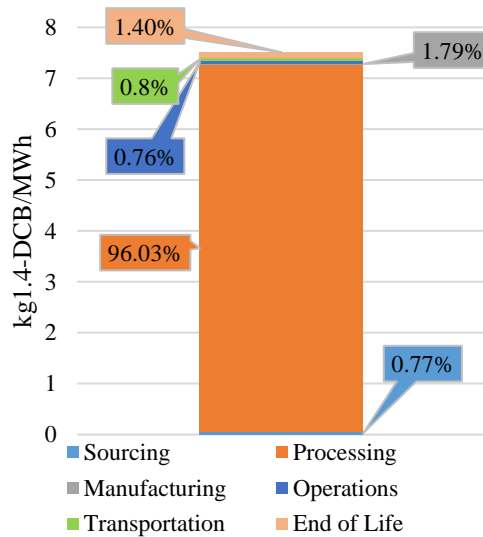

Ionizing radiation

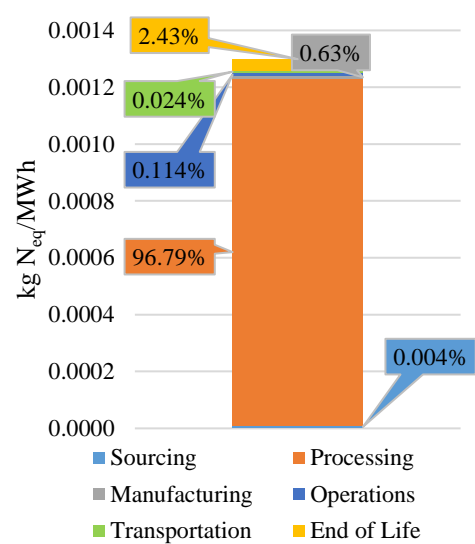

Marine ecotoxicity

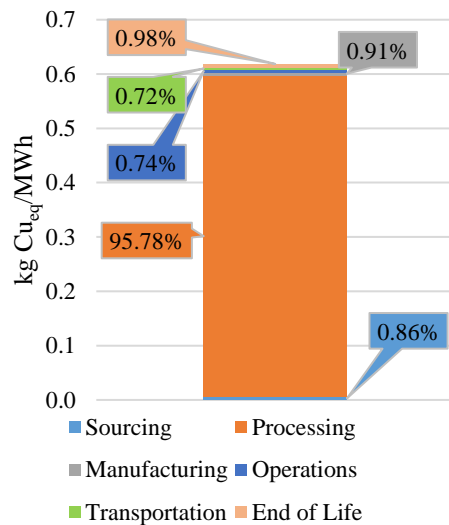

Marine Eutrophication

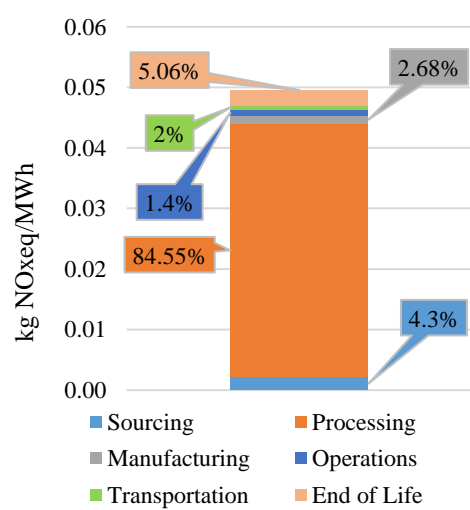

Mineral resource scarcity

Ozone formation, Human health

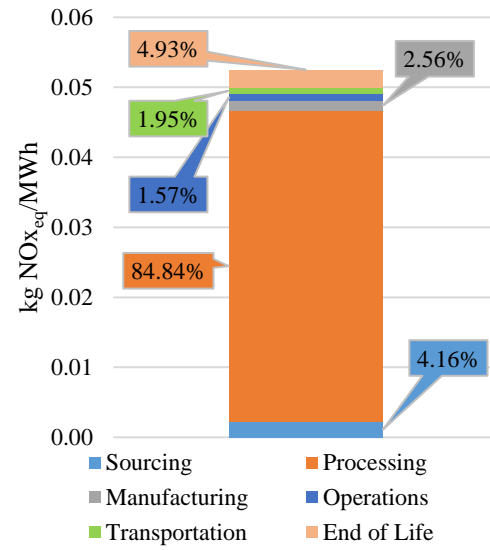

Ozone formation, Terrestrial ecosystems

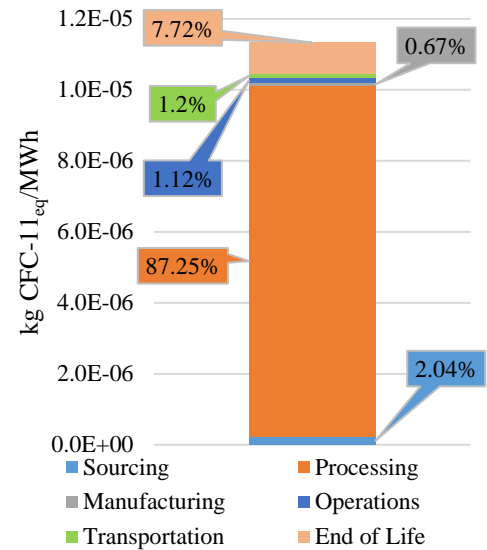

Stratospheric ozone depletion

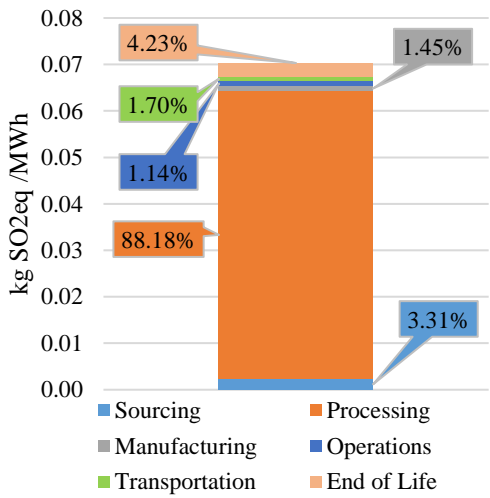

Terrestrial acidification

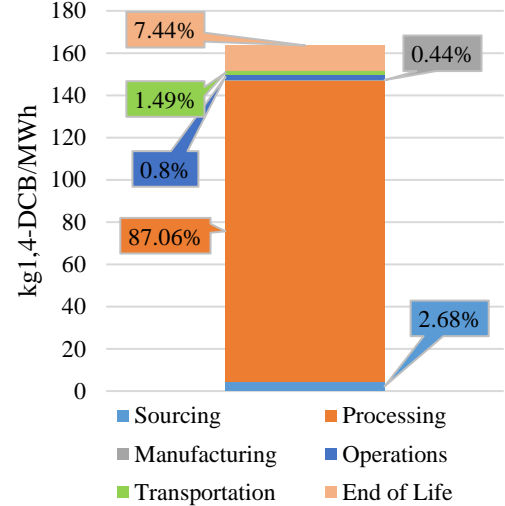

Terrestrial ecotoxicity

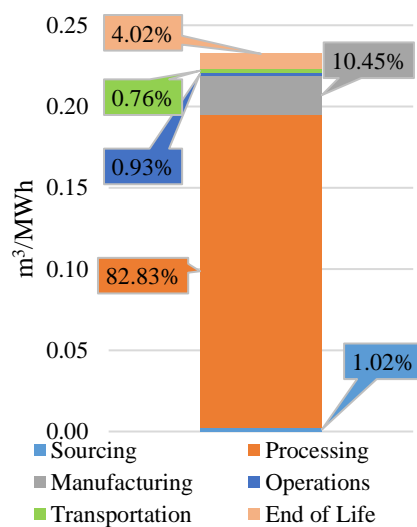

Water Consumption Potential

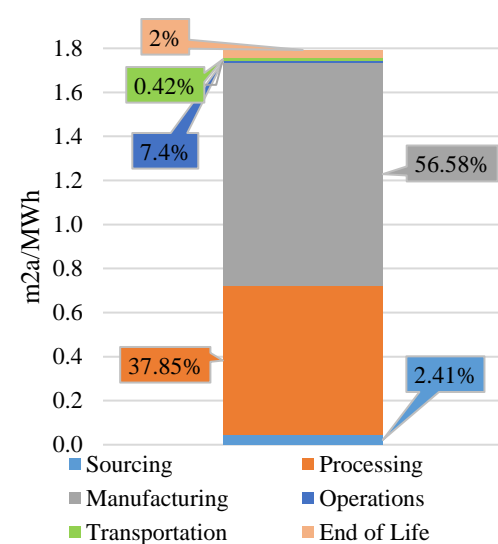

Land Use

Figure S7. Per MWh environmental impacts of 3 MW (424 nos) Wind Turbine

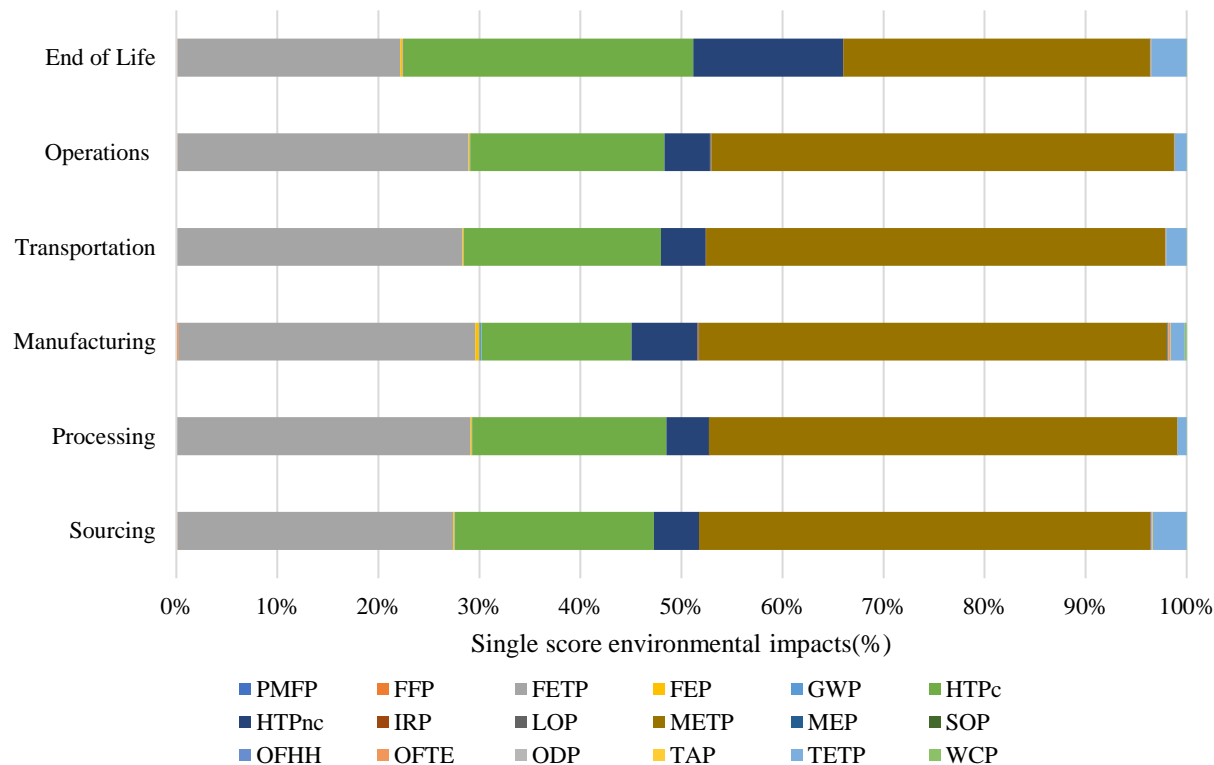

**Figure S8(a).** Per MWh Single Score Results/ life cycle phase for the WTG

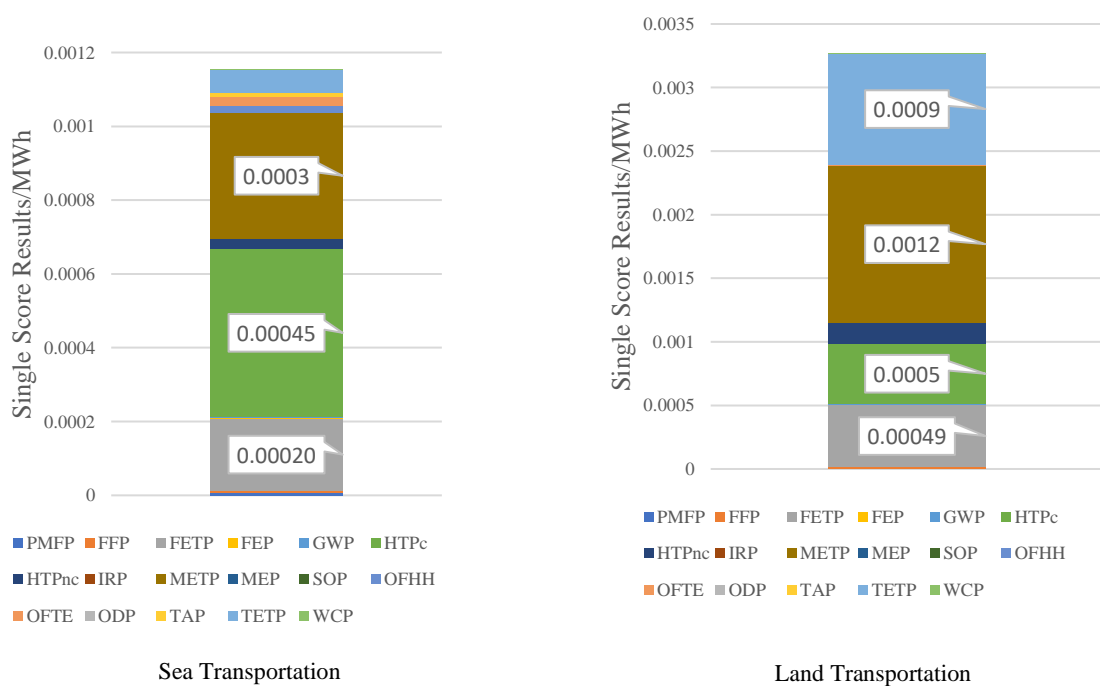

**Figure S8(b).** Single score environmental impacts of sea and land transport for the WTG



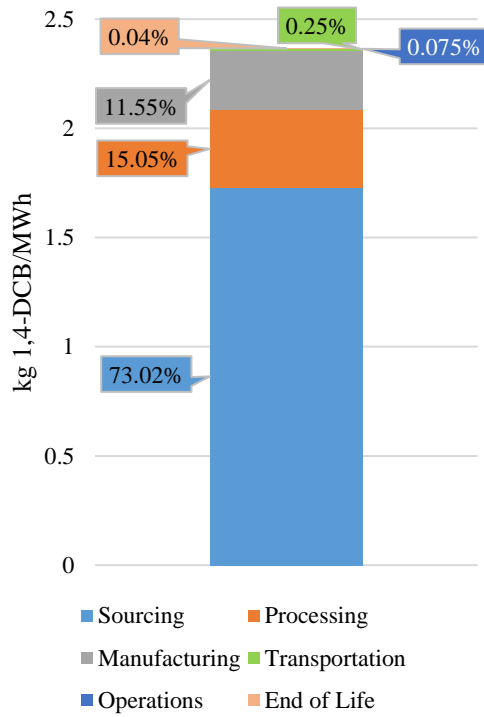

Freshwater Ecotoxicity

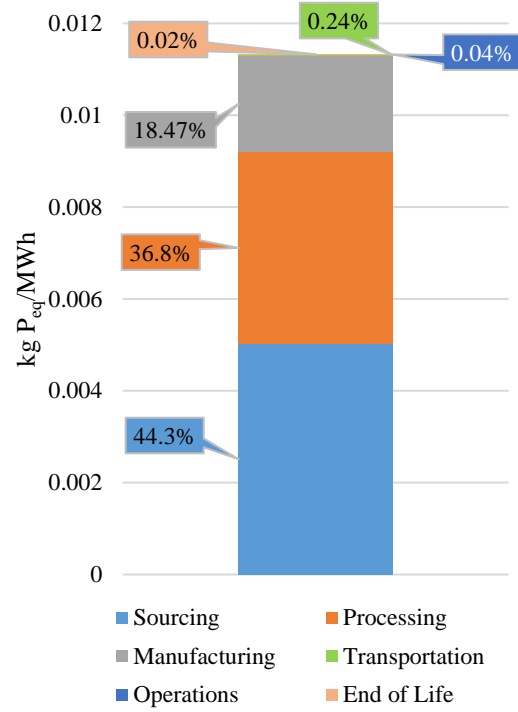

Freshwater Eutrophication

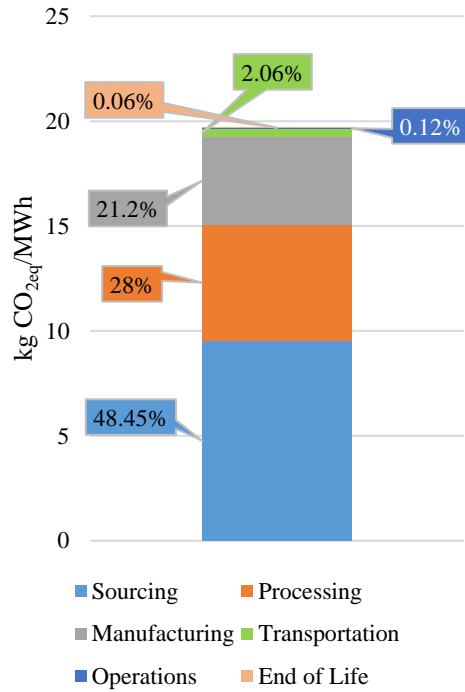

Global Warming

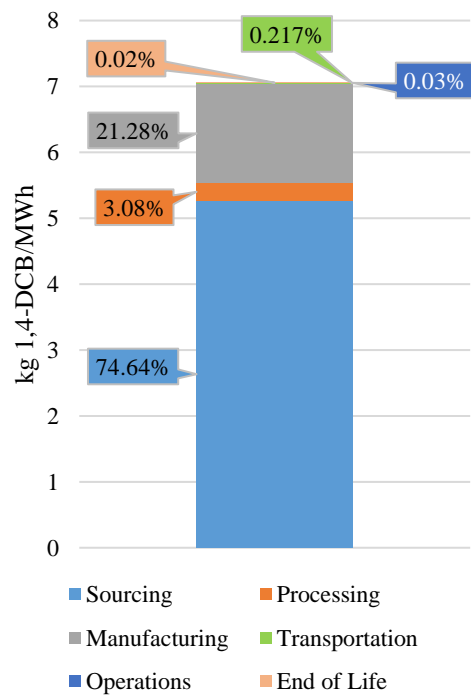

Human Carcinogenic Toxicity

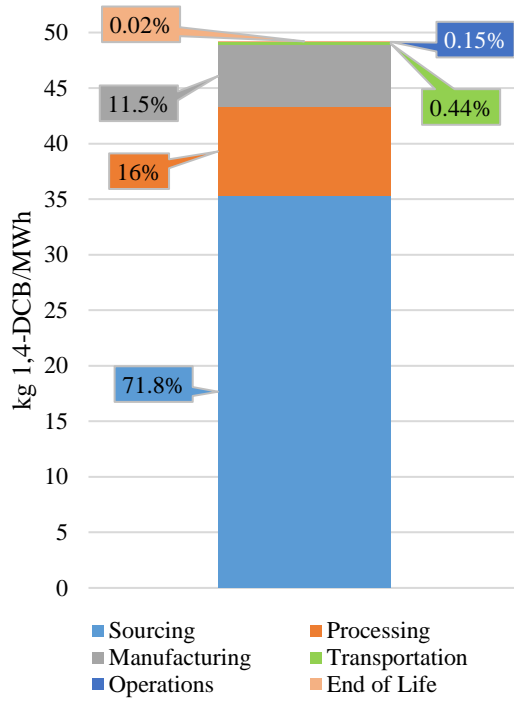

Human Non-Carcinogenic Toxicity

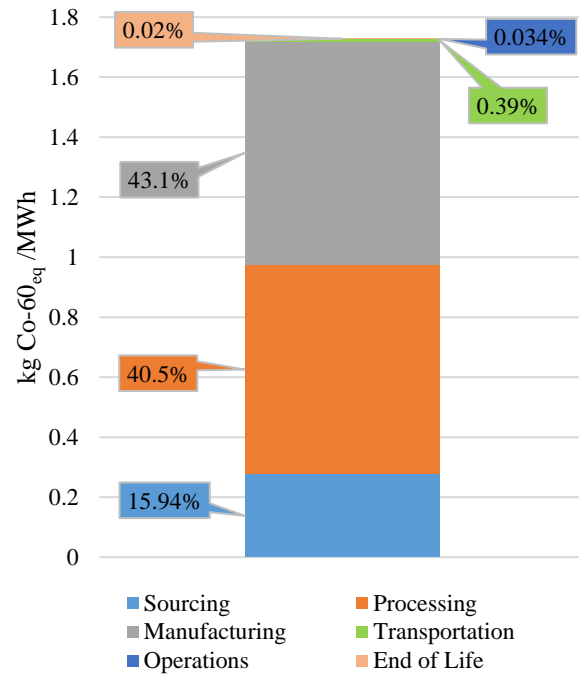

Ionization Radiation Potential

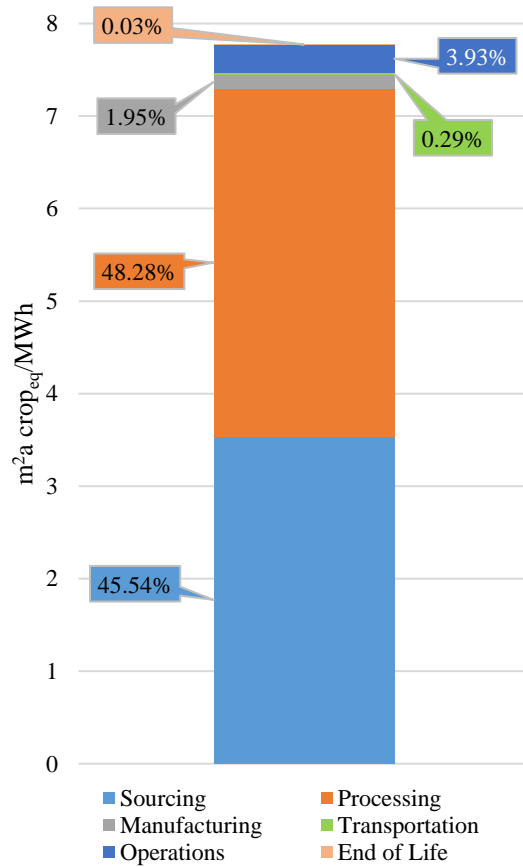

Land Use Potential

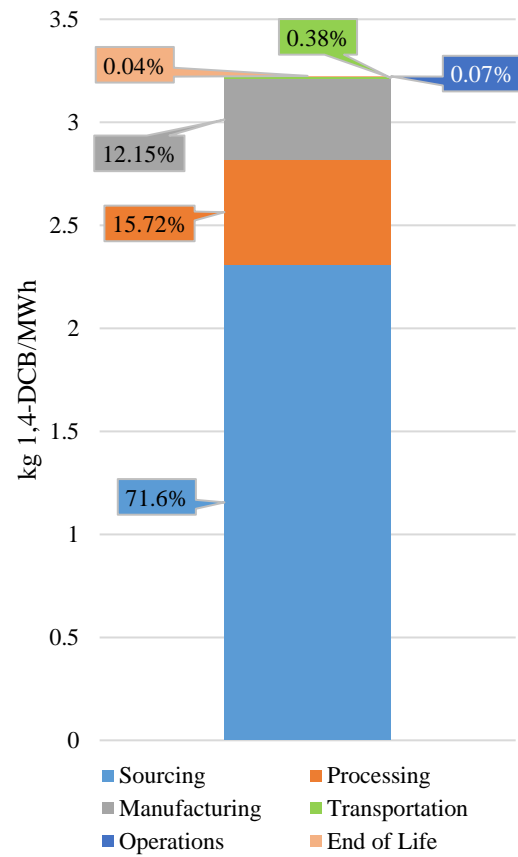

Marine Ecotoxicity

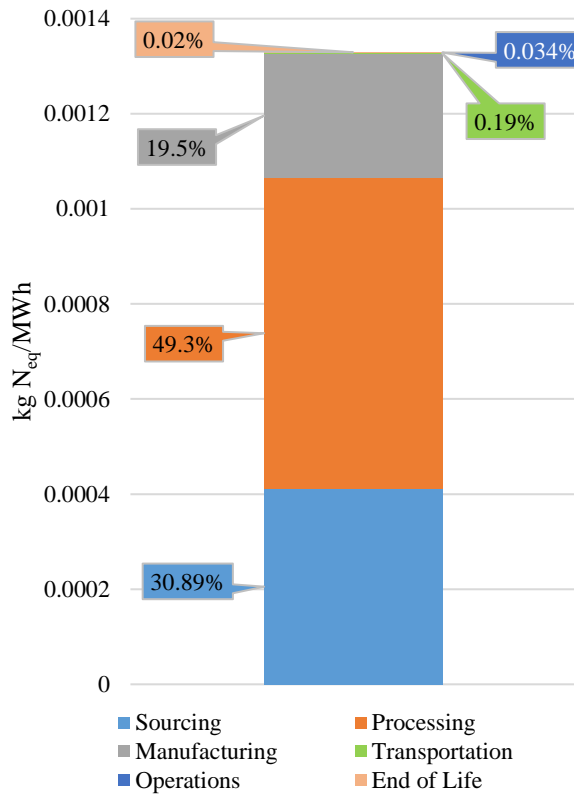

Marine Eutrophication

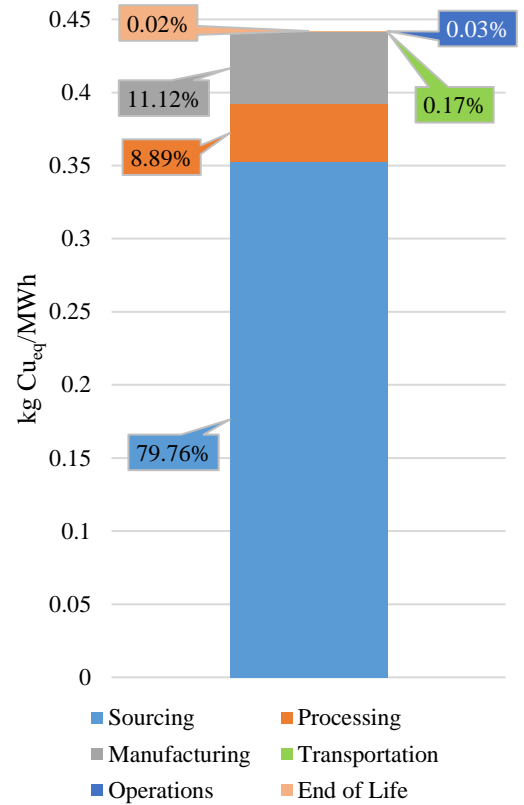

Mineral Resource Scarcity

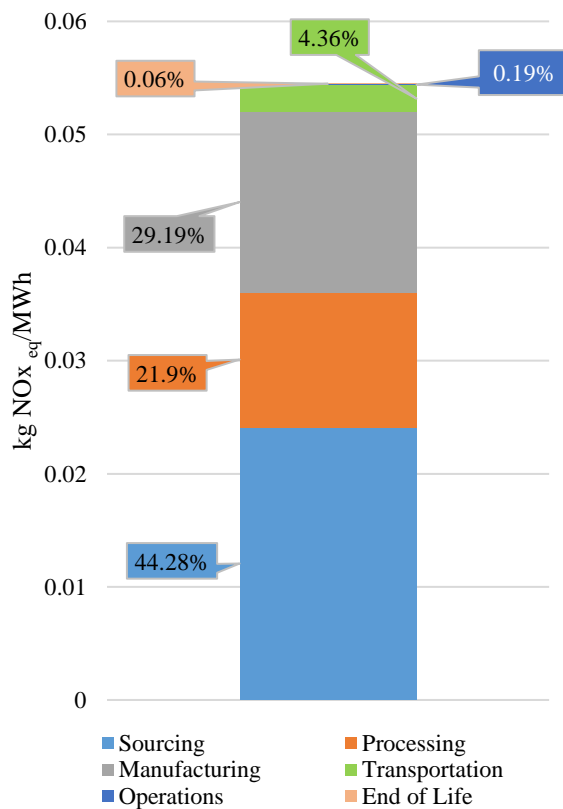

Ozone formation, Human health

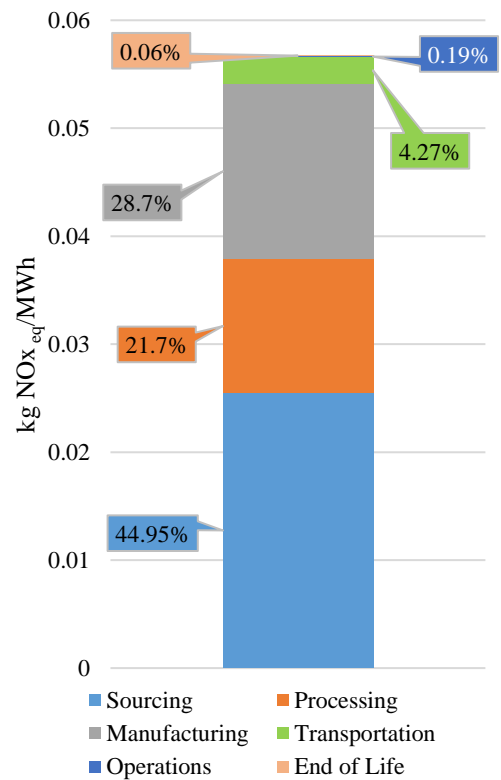

Ozone formation, Terrestrial Ecosystems

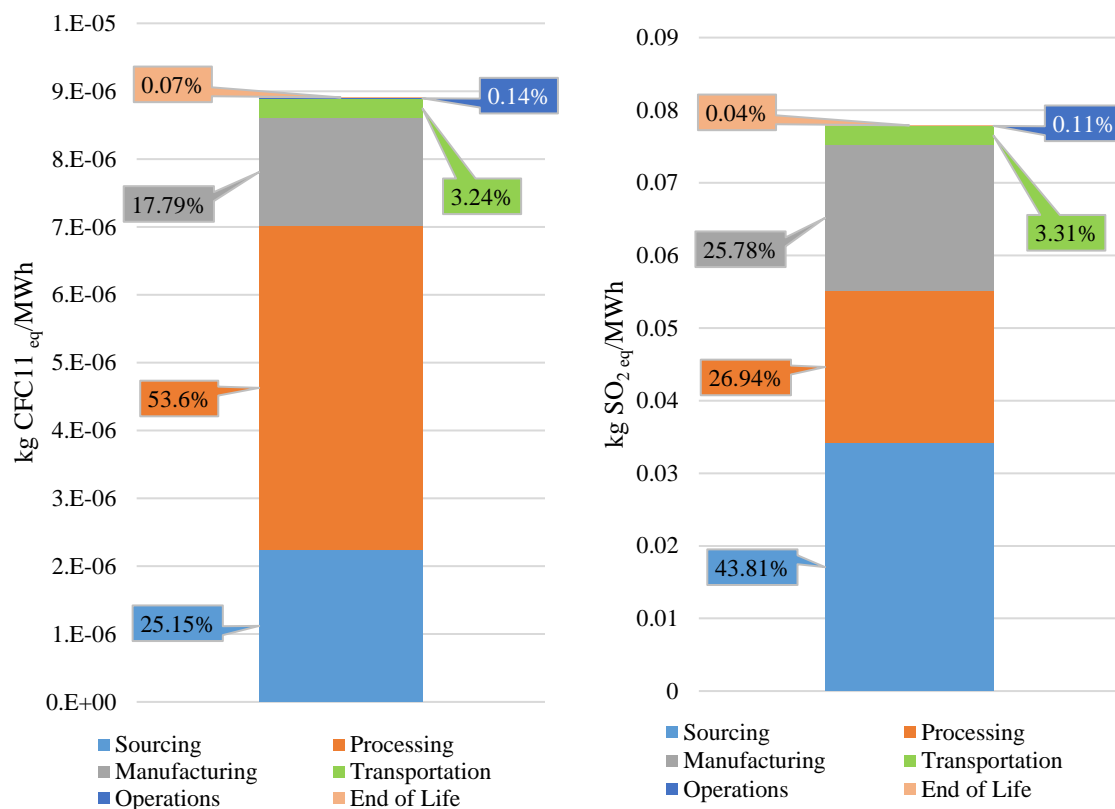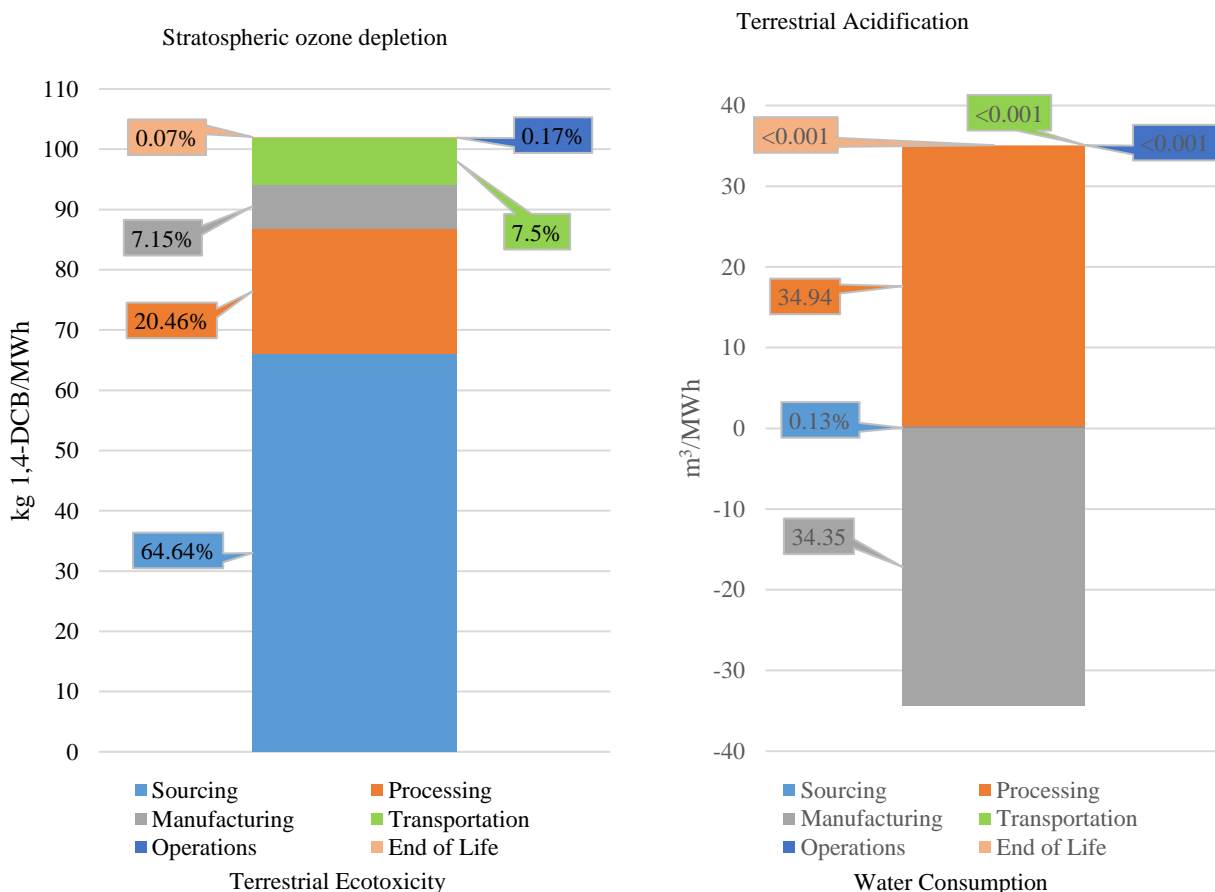

**Figure S10.** Per MWh environmental impacts of 1435 MW PV Power generation



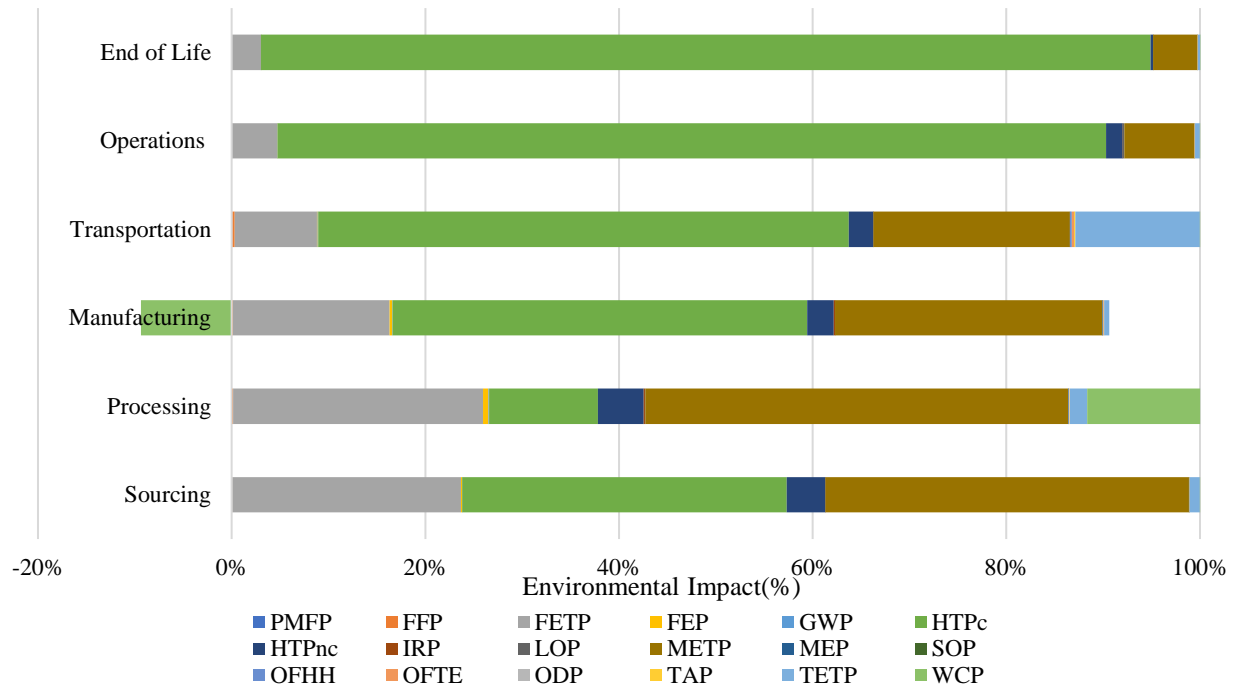

**Figure S11(a).** Per MWh Single Score Results/ life cycle phase for the 1435 MW solar panels

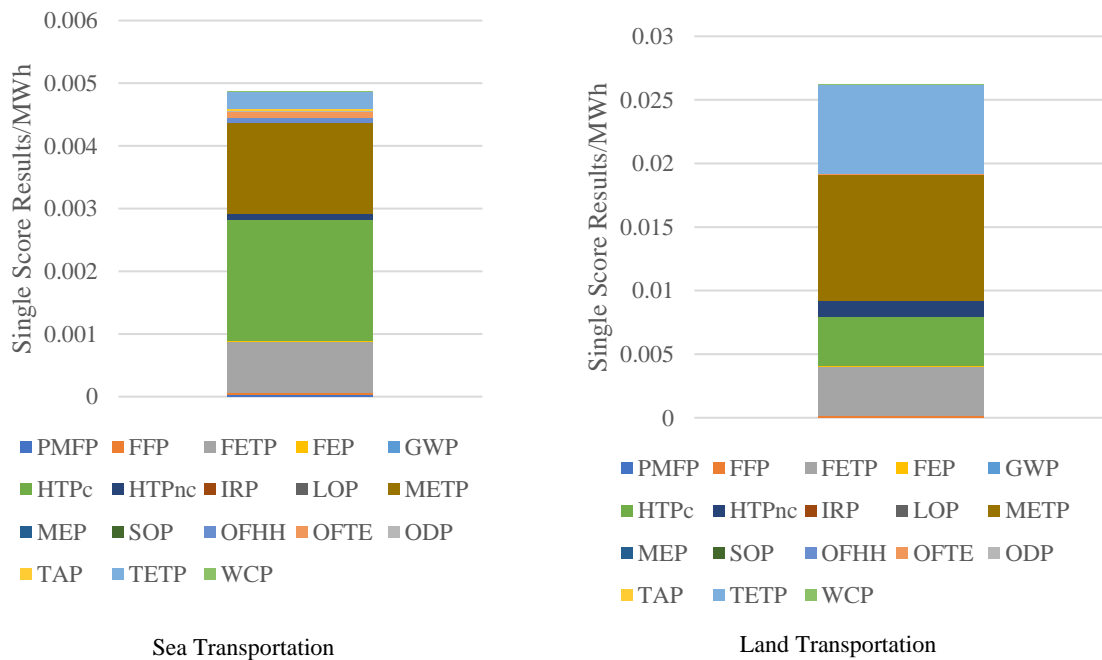

**Figure S11(b).** Single score environmental impacts of sea and land transport for solar panels

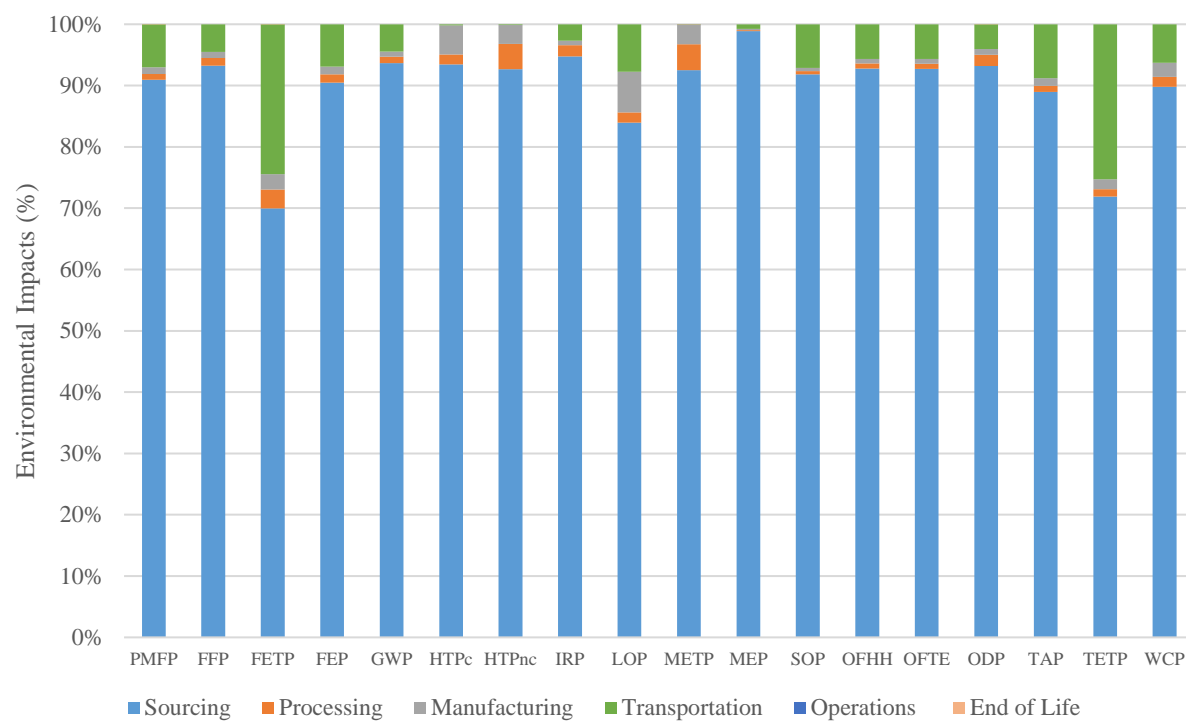

**Figure S12.** Percentage life cycle phase wise environmental impacts of 1MWh BESS

## TABLES

**Table S1.** Normalization Factors used in ReCiPe Midpoint (H)

| Reference unit                          | Factor |
|-----------------------------------------|--------|
| Fine particulate matter formation       | 25.6   |
| Fossil resource scarcity                | 980.4  |
| Freshwater ecotoxicity                  | 1.2    |
| Freshwater eutrophication               | 0.6    |
| Global warming                          | 7987.2 |
| Human carcinogenic toxicity             | 2.8    |
| Human non-carcinogenic toxicity         | 149.0  |
| Ionizing radiation                      | 480.8  |
| Land use                                | 6172.8 |
| Marine ecotoxicity                      | 1.0    |
| Marine eutrophication                   | 4.6    |
| Mineral resource scarcity               | 120048 |
| Ozone formation, Human health           | 20.6   |
| Ozone formation, Terrestrial ecosystems | 17.8   |
| Stratospheric ozone depletion           | 0.1    |
| Terrestrial acidification               | 41.0   |
| Terrestrial ecotoxicity                 | 1036.3 |
| Water consumption                       | 266.7  |

**Table S2.** Environmental Impact for sea and land transport in per tkm

| Environmental Parameter                 | Unit                                | Transport Raw Material |                |
|-----------------------------------------|-------------------------------------|------------------------|----------------|
|                                         |                                     | Sea (per tkm)          | Land (per tkm) |
| Fine particulate matter formation       | kg PM2.5 <sub>eq</sub>              | 0.00004                | 0.00010        |
| Fossil resource scarcity                | kg oil <sub>eq</sub>                | 0.00192                | 0.03286        |
| Freshwater ecotoxicity                  | kg 1,4-DCB                          | 0.00007                | 0.00147        |
| Freshwater eutrophication               | kg P <sub>eq</sub>                  | 0.00000                | 0.00001        |
| Global warming                          | kg CO <sub>2eq</sub>                | 0.00654                | 0.08975        |
| Human carcinogenic toxicity             | kg 1,4-DCB                          | 0.00035                | 0.00322        |
| Human non-carcinogenic toxicity         | kg 1,4-DCB                          | 0.00105                | 0.05982        |
| Ionizing radiation                      | kBq Co-60 <sub>eq</sub>             | 0.00007                | 0.00165        |
| Land use                                | m <sup>2</sup> a crop <sub>eq</sub> | 0.00002                | 0.00665        |
| Marine ecotoxicity                      | kg 1,4-DCB                          | 0.00010                | 0.00312        |
| Marine eutrophication                   | kg N <sub>eq</sub>                  | 0.00000                | 0.00000        |
| Mineral resource scarcity               | kg Cu <sub>eq</sub>                 | 0.00002                | 0.00015        |
| Ozone formation, Human health           | kg NO <sub>x</sub> eq               | 0.00011                | 0.00018        |
| Ozone formation, Terrestrial ecosystems | kg NO <sub>xeq</sub>                | 0.00011                | 0.00019        |
| Stratospheric ozone depletion           | kg CFC-11 <sub>eq</sub>             | 0.00000                | 0.00000        |
| Terrestrial acidification               | kg SO <sub>2eq</sub>                | 0.00012                | 0.00019        |
| Terrestrial ecotoxicity                 | kg 1,4-DCB                          | 0.01790                | 2.21417        |
| Water consumption                       | m <sup>3</sup>                      | 0.00001                | 0.00021        |

**Table S3.** Per MWh environmental impacts for the five electricity generating options

| Reference unit                      |       | CCGT-500 MW | Wind-3MW<br>(424 Nos) | Solar PV<br>1435 MW | Wind 3 (424<br>Nos) MW +<br>BESS<br>500MWh | Solar 1435<br>MW<br>+BESS<br>500MWh |
|-------------------------------------|-------|-------------|-----------------------|---------------------|--------------------------------------------|-------------------------------------|
| kg PM <sub>2.5eq</sub>              | PMFP  | 0.084       | 0.039                 | 0.037               | 0.111                                      | 0.109                               |
| kg oil <sub>eq</sub>                | FFP   | 130.5       | 5.5                   | 5.2                 | 13.4                                       | 13.0                                |
| kg 1,4-DCB                          | FETP  | 0.059       | 5.6                   | 2.4                 | 8.3                                        | 5.1                                 |
| kg P <sub>eq</sub>                  | FEP   | 0.0002      | 0.0127                | 0.0113              | 0.0298                                     | 0.0285                              |
| kg CO <sub>2eq</sub>                | GWP   | 468.5       | 18.3                  | 19.7                | 46.6                                       | 48.0                                |
| kg 1,4-DCB                          | HTPc  | 0.6         | 8.5                   | 7.7                 | 137.3                                      | 136.5                               |
| kg 1,4-DCB                          | HTPnc | 41.0        | 104.9                 | 49.2                | 8920.6                                     | 8864.9                              |
| kBq Co-60 <sub>eq</sub>             | IRP   | 0.016       | 1.3                   | 1.7                 | 4.5                                        | 5.0                                 |
| m <sup>2</sup> a crop <sub>eq</sub> | LOP   | 3.7         | 1.8                   | 7.8                 | 2.2                                        | 8.2                                 |
| kg 1,4-DCB                          | METP  | 0.073       | 7.5                   | 3.2                 | 10254.5                                    | 10250.2                             |
| kg N <sub>eq</sub>                  | MEP   | 0.00004     | 0.00130               | 0.00133             | 0.01545                                    | 0.01548                             |
| kg Cu <sub>eq</sub>                 | SOP   | 0.019       | 0.6                   | 0.4                 | 1.9                                        | 1.7                                 |
| kg NO <sub>xeq</sub>                | OFHH  | 0.6         | 0.0495                | 0.054               | 0.142                                      | 0.147                               |
| kg NO <sub>xeq</sub>                | OFTE  | 0.7         | 0.053                 | 0.057               | 0.146                                      | 0.150                               |
| kg CFC11 <sub>eq</sub>              | ODP   | 1.90E-07    | 1.13E-05              | 8.91E-06            | 2.89E-05                                   | 2.65E-05                            |
| kg SO <sub>2eq</sub>                | TAP   | 0.246       | 0.070                 | 0.078               | 0.237                                      | 0.245                               |
| kg 1,4-DCB                          | TETP  | 29.2        | 163.6                 | 102.1               | 438.6                                      | 377.0                               |
| m <sup>3</sup>                      | WCP   | 1.352       | 0.232                 | 0.738               | 0.663                                      | 1.168                               |

**Table S4.** Per MWh sensitivity of CF to impact pathways of a CCGT

| Environmental Impact                |                                         | CF-56%<br>612 MW | CF-68%<br>500MW | CF-76%<br>451MW |
|-------------------------------------|-----------------------------------------|------------------|-----------------|-----------------|
| kg PM <sub>2.5eq</sub>              | Fine particulate matter formation       | 0.0842           | 0.0840          | 0.0839          |
| kg oil <sub>eq</sub>                | Fossil resource scarcity                | 130.69           | 130.53          | 130.46          |
| kg 1,4-DCB                          | Freshwater ecotoxicity                  | 0.066            | 0.059           | 0.055           |
| kg P <sub>eq</sub>                  | Freshwater eutrophication               | 2.27E-04         | 1.86E-04        | 1.68E-04        |
| kg CO <sub>2eq</sub>                | Global warming                          | 468.64           | 468.51          | 468.46          |
| kg 1,4-DCB                          | Human carcinogenic toxicity             | 0.74             | 0.62            | 0.57            |
| kg 1,4-DCB                          | Human non-carcinogenic toxicity         | 41.16            | 41.04           | 40.99           |
| kBq Co-60 <sub>eq</sub>             | Ionizing radiation                      | 0.019            | 0.016           | 0.014           |
| m <sup>2</sup> a crop <sub>eq</sub> | Land use                                | 4.58             | 3.75            | 3.38            |
| kg 1,4-DCB                          | Marine ecotoxicity                      | 0.08             | 0.07            | 0.07            |
| kg N <sub>eq</sub>                  | Marine eutrophication                   | 4.25E-05         | 3.71E-05        | 3.48E-05        |
| kg Cu <sub>eq</sub>                 | Mineral resource scarcity               | 0.02             | 0.02            | 0.02            |
| kg NO <sub>xeq</sub>                | Ozone formation, Human health           | 0.65             | 0.65            | 0.65            |
| kg NO <sub>xeq</sub>                | Ozone formation, Terrestrial ecosystems | 0.65             | 0.65            | 0.65            |
| kg CFC11 <sub>eq</sub>              | Stratospheric ozone depletion           | 2.32E-07         | 1.90E-07        | 1.71E-07        |
| kg SO <sub>2eq</sub>                | Terrestrial acidification               | 0.25             | 0.25            | 0.25            |
| kg 1,4-DCB                          | Terrestrial ecotoxicity                 | 30.51            | 29.22           | 28.66           |
| m <sup>3</sup>                      | Water consumption                       | 1.41             | 1.35            | 1.32            |

**Table S5.** Per MWh sensitivity of CF to impact pathways of the Wind turbine generation

| <b>Environmental Impact</b>         |                                         | <b>CF-14%<br/>2819 MW</b> | <b>CF-31%<br/>1273 MW</b> | <b>CF-48%<br/>822 MW</b> |
|-------------------------------------|-----------------------------------------|---------------------------|---------------------------|--------------------------|
| kg PM2.5 <sub>eq</sub>              | Fine particulate matter formation       | 0.09                      | 0.04                      | 0.03                     |
| kg oil <sub>eq</sub>                | Fossil resource scarcity                | 12.30                     | 5.55                      | 3.59                     |
| kg 1,4-DCB                          | Freshwater ecotoxicity                  | 12.45                     | 5.62                      | 3.63                     |
| kg P <sub>eq</sub>                  | Freshwater eutrophication               | 0.0282                    | 0.0127                    | 0.0082                   |
| kg CO <sub>2eq</sub>                | Global warming                          | 40.51                     | 18.27                     | 11.81                    |
| kg 1,4-DCB                          | Human carcinogenic toxicity             | 18.89                     | 8.52                      | 5.51                     |
| kg 1,4-DCB                          | Human non-carcinogenic toxicity         | 232.65                    | 104.94                    | 67.82                    |
| kBq Co-60 <sub>eq</sub>             | Ionizing radiation                      | 2.81                      | 1.27                      | 0.82                     |
| m <sup>2</sup> a crop <sub>eq</sub> | Land use                                | 1.19                      | 0.53                      | 0.35                     |
| kg 1,4-DCB                          | Marine ecotoxicity                      | 16.64                     | 7.51                      | 4.85                     |
| kg N <sub>eq</sub>                  | Marine eutrophication                   | 0.00288                   | 0.00130                   | 0.00084                  |
| kg Cu <sub>eq</sub>                 | Mineral resource scarcity               | 1.37                      | 0.62                      | 0.40                     |
| kg NO <sub>xeq</sub>                | Ozone formation, Human health           | 0.1098                    | 0.0495                    | 0.0320                   |
| kg NO <sub>xeq</sub>                | Ozone formation, Terrestrial ecosystems | 0.1164                    | 0.0525                    | 0.0339                   |
| kg CFC11 <sub>eq</sub>              | Stratospheric ozone depletion           | 2.51E-05                  | 1.13E-05                  | 7.32E-06                 |
| kg SO <sub>2eq</sub>                | Terrestrial acidification               | 0.16                      | 0.07                      | 0.05                     |
| kg 1,4-DCB                          | Terrestrial ecotoxicity                 | 362.78                    | 163.64                    | 105.75                   |
| m <sup>3</sup>                      | Water consumption                       | 0.52                      | 0.23                      | 0.15                     |

**Table S6.** Per MWh sensitivity of CF to impact pathways of the solar PV generation

| <b>Environmental Impact</b>         |                                         | <b>CF-21%<br/>1777 MW</b> | <b>CF-26%<br/>1435 MW</b> | <b>CF-31%<br/>1204 MW</b> |
|-------------------------------------|-----------------------------------------|---------------------------|---------------------------|---------------------------|
| kg PM2.5 <sub>eq</sub>              | Fine particulate matter formation       | 0.041                     | 0.037                     | 0.034                     |
| kg oil <sub>eq</sub>                | Fossil resource scarcity                | 5.95                      | 5.19                      | 4.68                      |
| kg 1,4-DCB                          | Freshwater ecotoxicity                  | 2.62                      | 2.37                      | 2.19                      |
| kg P <sub>eq</sub>                  | Freshwater eutrophication               | 0.0125                    | 0.0113                    | 0.0105                    |
| kg CO <sub>2eq</sub>                | Global warming                          | 22.22                     | 19.68                     | 17.97                     |
| kg 1,4-DCB                          | Human carcinogenic toxicity             | 7.24                      | 7.06                      | 6.93                      |
| kg 1,4-DCB                          | Human non-carcinogenic toxicity         | 52.68                     | 49.21                     | 46.86                     |
| kBq Co-60 <sub>eq</sub>             | Ionizing radiation                      | 2.08                      | 1.73                      | 1.49                      |
| m <sup>2</sup> a crop <sub>eq</sub> | Land use                                | 7.86                      | 7.77                      | 7.72                      |
| kg 1,4-DCB                          | Marine ecotoxicity                      | 3.57                      | 3.23                      | 2.99                      |
| kg N <sub>eq</sub>                  | Marine eutrophication                   | 1.47E-03                  | 1.33E-03                  | 1.24E-03                  |
| kg Cu <sub>eq</sub>                 | Mineral resource scarcity               | 0.46                      | 0.44                      | 0.43                      |
| kg NO <sub>xeq</sub>                | Ozone formation, Human health           | 0.062                     | 0.054                     | 0.050                     |
| kg NO <sub>xeq</sub>                | Ozone formation, Terrestrial ecosystems | 0.064                     | 0.057                     | 0.052                     |
| kg CFC11 <sub>eq</sub>              | Stratospheric ozone depletion           | 1.01E-05                  | 8.91E-06                  | 8.08E-06                  |
| kg SO <sub>2eq</sub>                | Terrestrial acidification               | 0.088                     | 0.078                     | 0.071                     |
| kg 1,4-DCB                          | Terrestrial ecotoxicity                 | 109.62                    | 102.06                    | 96.96                     |
| m <sup>3</sup>                      | Water consumption                       | 0.85                      | 0.76                      | 0.70                      |

**Table S7.** Per MWh sensitivity of CF to impact pathways of the wind + BESS generation

| Environmental Impact                |                                         | CF-14%<br>2819 MW | CF-31%<br>1273 MW | CF-48%<br>822 MW |
|-------------------------------------|-----------------------------------------|-------------------|-------------------|------------------|
| kg PM2.5 <sub>eq</sub>              | Fine particulate matter formation       | 0.16              | 0.11              | 0.10             |
| kg oil <sub>eq</sub>                | Fossil resource scarcity                | 20.11             | 13.36             | 11.40            |
| kg 1,4-DCB                          | Freshwater ecotoxicity                  | 15.19             | 8.35              | 6.36             |
| kg P <sub>eq</sub>                  | Freshwater eutrophication               | 0.045             | 0.030             | 0.025            |
| kg CO <sub>2eq</sub>                | Global warming                          | 68.87             | 46.64             | 40.17            |
| kg 1,4-DCB                          | Human carcinogenic toxicity             | 147.68            | 137.31            | 134.29           |
| kg 1,4-DCB                          | Human non-carcinogenic toxicity         | 9048.34           | 8920.63           | 8883.51          |
| kBq Co-60 <sub>eq</sub>             | Ionizing radiation                      | 6.08              | 4.54              | 4.09             |
| m <sup>2</sup> a crop <sub>eq</sub> | Land use                                | 1.60              | 0.95              | 0.76             |
| kg 1,4-DCB                          | Marine ecotoxicity                      | 10263.59          | 10254.45          | 10251.79         |
| kg N <sub>eq</sub>                  | Marine eutrophication                   | 0.0170            | 0.0154            | 0.0150           |
| kg Cu <sub>eq</sub>                 | Mineral resource scarcity               | 2.61              | 1.86              | 1.64             |
| kg NO <sub>xeq</sub>                | Ozone formation, Human health           | 0.20              | 0.14              | 0.12             |
| kg NO <sub>xeq</sub>                | Ozone formation, Terrestrial ecosystems | 0.21              | 0.15              | 0.13             |
| kg CFC11 <sub>eq</sub>              | Stratospheric ozone depletion           | 4.27E-05          | 2.89E-05          | 2.49E-05         |
| kg SO <sub>2eq</sub>                | Terrestrial acidification               | 0.32              | 0.24              | 0.21             |
| kg 1,4-DCB                          | Terrestrial ecotoxicity                 | 637.71            | 438.57            | 380.68           |
| m <sup>3</sup>                      | Water consumption                       | 0.95              | 0.66              | 0.58             |

**Table S8.** Per MWh sensitivity of CF to impact pathways of the solar PV +BESS generation

| Environmental Impact                |                                         | CF-21%<br>1777 MW | CF-26%<br>1435 MW | CF-31%<br>1204 MW |
|-------------------------------------|-----------------------------------------|-------------------|-------------------|-------------------|
| kg PM2.5 <sub>eq</sub>              | Fine particulate matter formation       | 0.113             | 0.109             | 0.106             |
| kg oil <sub>eq</sub>                | Fossil resource scarcity                | 13.757            | 13.001            | 12.491            |
| kg 1,4-DCB                          | Freshwater ecotoxicity                  | 5.355             | 5.097             | 4.923             |
| kg P <sub>eq</sub>                  | Freshwater eutrophication               | 0.030             | 0.028             | 0.028             |
| kg CO <sub>2eq</sub>                | Global warming                          | 50.586            | 48.049            | 46.335            |
| kg 1,4-DCB                          | Human carcinogenic toxicity             | 136.031           | 135.845           | 135.719           |
| kg 1,4-DCB                          | Human non-carcinogenic toxicity         | 8868.372          | 8864.900          | 8862.556          |
| kBq Co-60 <sub>eq</sub>             | Ionizing radiation                      | 5.349             | 5.001             | 4.767             |
| m <sup>2</sup> a crop <sub>eq</sub> | Land use                                | 8.266             | 8.184             | 8.128             |
| kg 1,4-DCB                          | Marine ecotoxicity                      | 10250.510         | 10250.168         | 10249.936         |
| kg N <sub>eq</sub>                  | Marine eutrophication                   | 0.016             | 0.015             | 0.015             |
| kg Cu <sub>eq</sub>                 | Mineral resource scarcity               | 1.704             | 1.686             | 1.673             |
| kg NO <sub>xeq</sub>                | Ozone formation, Human health           | 0.154             | 0.147             | 0.142             |
| kg NO <sub>xeq</sub>                | Ozone formation, Terrestrial ecosystems | 0.157             | 0.150             | 0.145             |
| kg CFC11 <sub>eq</sub>              | Stratospheric ozone depletion           | 2.77E-05          | 2.65E-05          | 2.56E-05          |
| kg SO <sub>2eq</sub>                | Terrestrial acidification               | 0.255             | 0.245             | 0.238             |
| kg 1,4-DCB                          | Terrestrial ecotoxicity                 | 384.6             | 377.0             | 371.9             |
| m <sup>3</sup>                      | Water consumption                       | 1.284             | 1.193             | 1.126             |
